# Supplementary material for: Anatomical entity mention recognition at literature scale
Source: PubMed Central journal article supplement (PMC3957068; doi:10.1093/bioinformatics/btt580), 2013-10-25
Supplement: supp_btt580_anemtag-supp.pdf [file supp_btt580_anemtag-supp.pdf]

---

# Supplementary Information

## Anatomical Entity Mention Recognition at Literature Scale

Sampo Pyysalo and Sophia Ananiadou

---

This document provides supplementary information for the manuscript *Anatomical Entity Mention Recognition at Literature Scale*.

### 1 ONTOLOGICAL BASIS

The following Common Anatomy Reference Ontology (CARO) and Foundational Model of Anatomy (FMA) definitions delimit the primary scope of the annotation. The annotation targets are mentions of anatomical entities.

`anatomical_entityCARO`

Biological entity that is either an individual member of a biological species or constitutes the structural organization of an individual member of a biological species.

The primary subcategory of anatomical entity mentions are anatomical structures.

`anatomical_structureCARO`

Material anatomical entity that has inherent 3D shape and is generated by coordinated expression of the organism's own genome.

Anatomical structures are subdivided into comprehensive, nonoverlapping categories by granularity. We exclude from the scope of the annotation mentions of biological macromolecules and whole organisms.

`Biological_macromoleculeFMA`

Anatomical structure which has as its parts one or more ordered aggregates of nucleotide, amino acid fatty acid or sugar molecules bonded to one another.

`multi-cellular_organismCARO`

Anatomical structure that is an individual member of a species and consists of more than one cell.

To avoid overlap with organism name recognition tasks, we also exclude from annotation mentions of single cell organism names. We refer to Section 2.1 of the primary manuscript and the CARO and FMA ontologies for further information.

## 2 NERSUITE FEATURES

Table 1 details the features applied by NERSuite. Please refer to the paper for details on the feature category definitions.

**Table 1.** Features for entity detection

| Class       | Definition                                                                                                                                                                   |
|-------------|------------------------------------------------------------------------------------------------------------------------------------------------------------------------------|
| Token       | $\{w_{t-2}, \dots, w_{t+2}\}, \{w_{t-2,t-1}, \dots, w_{t+1,t+2}\}, \{\bar{w}_{t-2}, \dots, \bar{w}_{t+2}\}, \{\bar{w}_{t-2,t-1}, \dots, \bar{w}_{t+1,t+2}\}$                 |
| Lemma       | $\{l_{t-2}, \dots, l_{t+2}\}, \{l_{t-2,t-1}, \dots, l_{t+1,t+2}\}, \{\bar{l}_{t-2}, \dots, \bar{l}_{t+2}\}, \{\bar{l}_{t-2,t-1}, \dots, \bar{l}_{t+1,t+2}\}$                 |
| POS         | $\{p_{t-2}, \dots, p_{t+2}\}, \{p_{t-2,t-1}, \dots, p_{t+1,t+2}\}$                                                                                                           |
| Lemma & POS | $\{l_{t-2}p_{t-2}, \dots, l_{t+2}p_{t+2}\}, \{l_{t-2,t-1}p_{t-2,t-1}, \dots, l_{t+1,t+2}p_{t+1,t+2}\}$                                                                       |
| Chunk       | $\{c_t, w_{t,last}, \bar{w}_{t,last}, the_{1hs}\}$                                                                                                                           |
| Character   | Character 2,3,4-grams of $w_t$                                                                                                                                               |
| Orthography | All capitalized, all numbers, contain Greek letters, etc., following Lee <i>et al.</i> (2004)                                                                                |
| Dictionary  | $\{d_{t-2}, \dots, d_{t+2}\}, \{d_{t-2,t-1}, \dots, d_{t+1,t+2}\} \{d_{t-2}w_{t-2}, \dots, d_{t+2}w_{t+2}\},$<br>$\{d_{t-2,t-1}w_{t-2,t-1}, \dots, d_{t+1,t+2}w_{t+1,t+2}\}$ |

Symbols used:  $w_t$ : token text;  $l_t$ : lemma;  $p_t$ : POS tag;  $c_t$ : chunk tag;  $w_{t,last}$ : last word of current chunk;  $the_{1hs}$ : token “the” present in current chunk;  $d_t$ : dictionary matching result;  $\bar{x}$ : normalized form of  $x$ .

Dictionary features are only generated if matching against dictionaries has been performed for input data. NERSuite is not distributed with any dictionaries and does not perform matching against dictionaries automatically. Dictionaries need to be provided by the user and dictionary matching performed separately, e.g. using the `nersuite_dictionary_tagger` tool distributed with NERSuite.

Note that while extensions such as truecasing and non-local features (see Section 3 of the manuscript) are incorporated into the NERSuite feature representation, they are not part of the standard NERSuite implementation.

### 3 APPLICATION OF METAMAP AND UMLS<sup>®</sup> RESOURCES

The MetaMapped Medline<sup>®</sup> data<sup>1</sup> applied to create the UMLS-based dictionary was created by NLM<sup>®</sup> using MetaMap with the command

```
metamap11v2 -Z 1112 -qE -Q 4
```

(see [http://metamap.nlm.nih.gov/MM11\\_Usage.shtml](http://metamap.nlm.nih.gov/MM11_Usage.shtml) for information on MetaMap parameters.)

For MetaMap-based anatomical entity mention tagging, we applied MetaMap with the command

```
metamap12 -J acab,anab,anst,bdsu,bdsy,blor,bpoc,bsoj,celc,cell,emst,ffas,neop,tisu
```

Here, the `-J` argument constrains tagging to the following subset of UMLS classes

**Table 2.** Tagged UMLS semantic types

|      |                                      |
|------|--------------------------------------|
| acab | Acquired Abnormality                 |
| anab | Anatomical Abnormality               |
| anst | Anatomical Structure                 |
| bdsu | Body Substance                       |
| bdsy | Body System                          |
| blor | Body Location or Region              |
| bpoc | Body Part, Organ, or Organ Component |
| bsoj | Body Space or Junction               |
| celc | Cell Component                       |
| cell | Cell                                 |
| emst | Embryonic Structure                  |
| ffas | Fully Formed Anatomical Structure    |
| neop | Neoplastic Process                   |
| tisu | Tissue                               |

(see <http://mmtx.nlm.nih.gov/MMTx/semanticTypes.shtml> for the definitions of the UMLS semantic types)

<sup>1</sup> <http://skr.nlm.nih.gov/resource/MetaMappedBaselineInfo.shtml>

## 4 APPLICATION OF OBO FOUNDRY RESOURCES

Table 3 lists the selected OBO Foundry “anatomy” domain resources from which the OBO dictionary was extracted.

**Table 3.** Applied OBO anatomy resources

| Resource name (prefix)                                              | Size  |
|---------------------------------------------------------------------|-------|
| Foundational Model of Anatomy ( <b>FMA</b> )                        | 78977 |
| Drosophila gross anatomy ( <b>FBbt</b> )                            | 7338  |
| C. elegans gross anatomy ( <b>WBbt</b> )                            | 7132  |
| Uber anatomy ontology ( <b>UBERON</b> )                             | 6339  |
| BRENDA tissue / enzyme source ( <b>BTO</b> )                        | 5139  |
| Teleost Anatomy Ontology ( <b>TAO</b> )                             | 3038  |
| Gene Ontology* Cellular component subontology ( <b>GO-CC</b> )      | 2982  |
| Mouse adult gross anatomy ( <b>MA</b> )                             | 2982  |
| Zebrafish anatomy and development ( <b>ZFA</b> )                    | 2708  |
| Human developmental anatomy, abstract version, v2 ( <b>EHDAA2</b> ) | 2464  |
| Hymenoptera Anatomy Ontology ( <b>HAO</b> )                         | 1903  |
| Cell type ( <b>CL</b> )                                             | 1882  |
| Mosquito gross anatomy ( <b>TGMA</b> )                              | 1861  |
| Amphibian gross anatomy ( <b>AAO</b> )                              | 1603  |
| Plant Ontology ( <b>PO</b> )                                        | 1270  |
| Subcellular anatomy ontology ( <b>SAO</b> )                         | 826   |
| Xenopus anatomy and development ( <b>XAO</b> )                      | 817   |
| Tick gross anatomy ( <b>TADS</b> )                                  | 628   |
| Spider Ontology ( <b>SPD</b> )                                      | 577   |
| Vertebrate Anatomy Ontology ( <b>VAO</b> )                          | 139   |
| Dictyostelium discoideum anatomy ( <b>DDANAT</b> )                  | 138   |
| Anatomical Entity Ontology ( <b>AEO</b> )                           | 137   |
| Dendritic cell ( <b>DC_CL</b> )                                     | 113   |
| Bilateria anatomy ( <b>BILA</b> )                                   | 105   |
| Fungal gross anatomy ( <b>FAO</b> )                                 | 81    |
| Common Anatomy Reference Ontology ( <b>CARO</b> )                   | 48    |

## 5 CORPUS ANNOTATION STATISTICS

Table 4 presents the statistics of the AnatEM corpus by annotated entity type.

**Table 4.** Corpus annotation statistics

| Type                            | Count |
|---------------------------------|-------|
| ORGANISM SUBDIVISION            | 336   |
| ANATOMICAL SYSTEM               | 112   |
| ORGAN                           | 863   |
| MULTI-TISSUE STRUCTURE          | 1695  |
| TISSUE                          | 843   |
| CELL                            | 4521  |
| DEVELOPING ANATOMICAL STRUCTURE | 100   |
| CELLULAR COMPONENT              | 829   |
| ORGANISM SUBSTANCE              | 685   |
| IMMATERIAL ANATOMICAL ENTITY    | 261   |
| PATHOLOGICAL FORMATION          | 391   |
| CANCER                          | 3065  |

## 6 EVALUATION WITH DIFFERENT MATCHING CRITERIA

Tables 5–8 present detailed results for the comparative evaluation on test data for various matching criteria.

**Table 5.** Evaluation on test data, exact matching criterion (precision / recall / F-score)

| Method        | Single-class |      |             | Multi-class |      |             |
|---------------|--------------|------|-------------|-------------|------|-------------|
|               | P            | R    | F           | P           | R    | F           |
| BioContext    | 56.2         | 22.4 | 32.1        | -           | -    | -           |
| MetaMap       | 51.5         | 58.1 | 54.6        | -           | -    | -           |
| Illinois      | 83.1         | 65.2 | 73.1        | 77.5        | 60.8 | 68.1        |
| Gimli         | 87.3         | 75.1 | 80.8        | -           | -    | -           |
| NERsuite      | 87.1         | 77.9 | 82.2        | 84.1        | 72.1 | 77.7        |
| AnatomyTagger | 88.5         | 82.6 | <b>85.5</b> | 84.1        | 75.4 | <b>79.5</b> |

**Table 6.** Evaluation on test data, left boundary matching criterion (precision / recall / F-score)

| Method        | Single-class |      |             | Multi-class |      |             |
|---------------|--------------|------|-------------|-------------|------|-------------|
|               | P            | R    | F           | P           | R    | F           |
| BioContext    | 68.3         | 27.2 | 38.9        | -           | -    | -           |
| MetaMap       | 60.3         | 67.6 | 63.8        | -           | -    | -           |
| Illinois      | 88.5         | 69.4 | 77.8        | 79.6        | 62.4 | 69.9        |
| Gimli         | 90.5         | 77.8 | 83.7        | -           | -    | -           |
| NERsuite      | 89.8         | 80.3 | 84.8        | 85.7        | 73.4 | 79.1        |
| AnatomyTagger | 90.7         | 84.8 | <b>87.6</b> | 85.4        | 76.5 | <b>80.7</b> |

**Table 7.** Evaluation on test data, right boundary matching criterion (precision / recall / F-score)

| Method        | Single-class |      |             | Multi-class |      |             |
|---------------|--------------|------|-------------|-------------|------|-------------|
|               | P            | R    | F           | P           | R    | F           |
| BioContext    | 68.3         | 27.3 | 39.0        | -           | -    | -           |
| MetaMap       | 63.8         | 71.1 | 67.3        | -           | -    | -           |
| Illinois      | 92.2         | 72.2 | 81.0        | 85.6        | 67.1 | 75.2        |
| Gimli         | 93.8         | 80.6 | 86.7        | -           | -    | -           |
| NERsuite      | 94.4         | 84.5 | 89.2        | 90.4        | 77.5 | 83.5        |
| AnatomyTagger | 94.8         | 88.6 | <b>91.6</b> | 90.0        | 80.7 | <b>85.1</b> |

All methods other than MetaMap show higher precision than recall for all criteria, with BioContext performance in particular being limited by low recall. F-scores increase in cases by over 10% points when moving from exact matching to overlap matching, indicating that differences in tagged and annotated entity boundaries are a frequent source of error when evaluating with strict matching. Regardless of the matching criteria applied, the ranking of the methods by F-score remains unchanged.

**Table 8.** Evaluation on test data, overlap matching criterion (precision / recall / F-score)

| Method        | Single-class |      |             | Multi-class |      |             |
|---------------|--------------|------|-------------|-------------|------|-------------|
|               | P            | R    | F           | P           | R    | F           |
| BioContext    | 84.6         | 32.5 | 46.9        | -           | -    | -           |
| MetaMap       | 73.7         | 76.9 | 75.3        | -           | -    | -           |
| Illinois      | 98.0         | 75.7 | 85.4        | 87.6        | 68.5 | 76.9        |
| Gimli         | 96.9         | 83.4 | 89.7        | -           | -    | -           |
| NERsuite      | 96.9         | 86.8 | 91.5        | 92.0        | 78.8 | 84.9        |
| AnatomyTagger | 96.8         | 90.6 | <b>93.6</b> | 91.4        | 81.8 | <b>86.3</b> |

## 7 EVALUATION RESULTS BY DOMAIN

Table 9 shows evaluation results separately the two subdomains of the literature from which the AnatEM corpus documents have been drawn: random biomedical publications, and abstracts of publications regarding cancer. Please refer to Section 3.7 in the main manuscript for further information on the corpus construction.

**Table 9.** Evaluation on test data for randomly drawn and cancer domain documents, right boundary matching criterion (F-scores). Overall results repeated for reference.

| Method        | Random       |             | Cancer       |             | Overall      |             |
|---------------|--------------|-------------|--------------|-------------|--------------|-------------|
|               | Single-class | Multi-class | Single-class | Multi-class | Single-class | Multi-class |
| BioContext    | 49.5         | -           | 33.6         | -           | 39.0         | -           |
| MetaMap       | 62.5         | -           | 69.5         | -           | 67.3         | -           |
| Illinois      | 69.6         | 62.6        | 85.4         | 80.1        | 81.0         | 75.2        |
| Gimli         | 75.3         | -           | 91.3         | -           | 86.7         | -           |
| NERsuite      | 80.7         | 72.3        | 92.7         | 87.9        | 89.2         | 83.5        |
| AnatomyTagger | <b>85.1</b>  | <b>76.6</b> | <b>94.4</b>  | <b>88.6</b> | <b>91.6</b>  | <b>85.1</b> |

The two methods based on dictionary matching perform better on random documents, perhaps reflecting particular challenges on cancer domain documents. As expected, the machine learning-based methods show better performance on restricted domain (cancer) documents than on general-domain (random) documents, reflecting the sparsity and variety of examples in the latter. Despite the different strengths, the ranking of the methods remains the same as in the overall evaluation for both subsets of the data.

## 8 EVALUATION RESULTS BY ENTITY TYPE

Tables 10–12 show test set evaluation results by entity type for the methods that could be trained to perform multi-class entity mention detection. Overlap matching criteria are applied to reduce the effects of boundary errors on evaluated performance.

**Table 10.** Illinois tagger evaluation on test data, overlap matching criterion (precision / recall / F-score)

| Type                            | Prec. | Recall | F-score |
|---------------------------------|-------|--------|---------|
| ANATOMICAL SYSTEM               | 3.9   | 20.5   | 6.6     |
| CANCER                          | 84.1  | 76.2   | 80.0    |
| CELL                            | 88.6  | 75.9   | 81.8    |
| CELLULAR COMPONENT              | 41.2  | 27.4   | 32.9    |
| DEVELOPING ANATOMICAL STRUCTURE | 17.9  | 28.3   | 21.9    |
| IMMATERIAL ANATOMICAL ENTITY    | 14.2  | 23.4   | 17.6    |
| MULTI-TISSUE STRUCTURE          | 42.4  | 41.1   | 41.7    |
| ORGAN                           | 45.1  | 39.4   | 42.0    |
| ORGANISM SUBDIVISION            | 10.9  | 13.0   | 11.8    |
| ORGANISM SUBSTANCE              | 61.7  | 42.8   | 50.5    |
| PATHOLOGICAL FORMATION          | 16.7  | 20.8   | 18.6    |
| TISSUE                          | 25.2  | 36.9   | 29.9    |

**Table 11.** NERsuite evaluation on test data, overlap matching criterion (precision / recall / F-score)

| Type                            | Prec. | Recall | F-score |
|---------------------------------|-------|--------|---------|
| ANATOMICAL SYSTEM               | 7.5   | 19.2   | 10.8    |
| CANCER                          | 92.5  | 80.3   | 86.0    |
| CELL                            | 94.6  | 81.7   | 87.6    |
| CELLULAR COMPONENT              | 65.6  | 45.2   | 53.5    |
| DEVELOPING ANATOMICAL STRUCTURE | 27.4  | 26.7   | 27.0    |
| IMMATERIAL ANATOMICAL ENTITY    | 16.5  | 25.4   | 20.0    |
| MULTI-TISSUE STRUCTURE          | 59.1  | 45.9   | 51.7    |
| ORGAN                           | 62.8  | 63.8   | 63.3    |
| ORGANISM SUBDIVISION            | 13.2  | 19.3   | 15.6    |
| ORGANISM SUBSTANCE              | 80.1  | 64.4   | 71.4    |
| PATHOLOGICAL FORMATION          | 24.1  | 38.9   | 29.8    |
| TISSUE                          | 41.0  | 44.6   | 42.8    |

As expected, the performance of the machine learning correlates strongly with the number of examples (Table 4) ranging from very low (6-11% F-score) for rare types such as ANATOMICAL SYSTEM to high (81-91% F-score) for the most common types CELL and CANCER.

**Table 12.** AnatomyTagger evaluation on test data, overlap matching criterion (precision / recall / F-score)

| Type                            | Prec. | Recall | F-score |
|---------------------------------|-------|--------|---------|
| ANATOMICAL SYSTEM               | 9.1   | 14.9   | 11.3    |
| CANCER                          | 94.5  | 87.9   | 91.1    |
| CELL                            | 96.5  | 84.5   | 90.1    |
| CELLULAR COMPONENT              | 65.2  | 46.5   | 54.3    |
| DEVELOPING ANATOMICAL STRUCTURE | 17.0  | 30.2   | 21.8    |
| IMMATERIAL ANATOMICAL ENTITY    | 13.0  | 34.4   | 18.8    |
| MULTI-TISSUE STRUCTURE          | 58.6  | 47.9   | 52.7    |
| ORGAN                           | 63.4  | 57.3   | 60.2    |
| ORGANISM SUBDIVISION            | 19.5  | 22.4   | 20.8    |
| ORGANISM SUBSTANCE              | 81.6  | 55.3   | 65.9    |
| PATHOLOGICAL FORMATION          | 24.7  | 47.7   | 32.5    |
| TISSUE                          | 38.5  | 45.2   | 41.6    |

## 9 ANALYSIS OF TAGGING ERRORS

Tables 13–16 show the strings that were most frequently tagged by each method but not annotated as anatomical entity mentions in the corpus (false positives) and the annotated strings that were most frequently not tagged by each system. Overlap matching criteria and single-class evaluation are applied to reduce the effects of boundary and entity typing errors on the analysis.

**Table 13.** Most frequent false positives and negatives on test data for BioContext

| False positive |       | False negative |       |
|----------------|-------|----------------|-------|
| String         | Count | String         | Count |
| ST             | 12    | tumor          | 174   |
| fibroblast     | 12    | cells          | 134   |
| PS             | 10    | cell           | 125   |
| PSP            | 9     | tumors         | 50    |
| HGF            | 8     | cancer         | 49    |
| band           | 8     | vascular       | 47    |
| TLX            | 7     | tissue         | 46    |
| KB             | 7     | serum          | 44    |
| platelet       | 6     | cellular       | 42    |
| MR             | 6     | tumour         | 32    |

Short, ambiguous abbreviations are a problem for the precision of BioContext, and that the low recall of is primarily caused by not tagging common non-specific mentions of anatomical entities such as *tumor* and *cells*.



**Table 14.** Most frequent false positives and negatives on test data for MetaMap

| String               | False positive |       | False negative |       |
|----------------------|----------------|-------|----------------|-------|
|                      | String         | Count | String         | Count |
| time                 |                | 62    | tumor          | 25    |
| genetic              |                | 56    | cells          | 22    |
| metastasis           |                | 53    | wound          | 18    |
| lower                |                | 34    | SCC            | 16    |
| medium               |                | 26    | samples        | 15    |
| sites                |                | 25    | Mo             | 12    |
| process              |                | 25    | cell           | 12    |
| tumorigenesis        |                | 24    | surface        | 11    |
| vascular endothelial |                | 22    | cultures       | 10    |
| origin               |                | 22    | cellular       | 10    |

MetaMap false positives indicate that a number of unexpected strings match in UMLS with one or more of the semantic classes shown in Table 2 (e.g. *time* as Body Location or Region). Potential issues with semantic class boundaries or class selection is indicated by e.g. the appearance of *metastasis* as a false positive and *tumor* as false negative. As expected, ambiguous words such as *surface* requiring disambiguation based on context represent a challenge for the tagger.

**Table 15.** Most frequent false positives and negatives on test data for Illinois tagger

| String     | False positive |       | String      | Count |
|------------|----------------|-------|-------------|-------|
|            | String         | Count |             |       |
| surface    |                | 8     | growth cone | 21    |
| cystic     |                | 3     | beta-cell   | 21    |
| anticancer |                | 3     | tumor       | 19    |
| tumour     |                | 2     | cell        | 16    |
| thyroid    |                | 2     | samples     | 14    |
| platelet   |                | 2     | Mo          | 12    |
| nuclear    |                | 2     | hip         | 11    |
| neural     |                | 2     | fetal       | 10    |
| muscle     |                | 2     | LE          | 9     |
| membranes  |                | 2     | CC-RCC      | 9     |

The machine learning-based taggers show fewer clear patterns in their false positives, but share much of the list of most frequent false negatives. The most frequent false negative for all machine learning based systems except AnatomyTagger is one that never appears tagged in the training data. That AnatomyTagger succeeds to tag this string may reflect the use of external resources (dictionaries) in the system, providing additional background knowledge on anatomical entities that is lacking from the other systems. Short, ambiguous abbreviations remain challenging also for the machine learning-based systems.

**Table 16.** Most frequent false positives and negatives on test data for Gimli

| False positive    |       | False negative |       |
|-------------------|-------|----------------|-------|
| String            | Count | String         | Count |
| corticosteroids   | 8     | growth cone    | 21    |
| surface           | 5     | Mo             | 12    |
| heminasal aplasia | 4     | hip            | 10    |
| food samples      | 4     | CC-RCC         | 9     |
| cystic            | 3     | LE             | 8     |
| CCC               | 3     | Ve             | 7     |
| capsular          | 3     | PF suture      | 7     |
| anticancer        | 3     | GB             | 7     |
| stromal cell      | 2     | strain         | 6     |
| samples           | 2     | samples        | 6     |

**Table 17.** Most frequent false positives and negatives on test data for NERSuite

| False positive    |       | False negative |       |
|-------------------|-------|----------------|-------|
| String            | Count | String         | Count |
| surface           | 5     | growth cone    | 21    |
| heminasal aplasia | 4     | Mo             | 12    |
| food samples      | 4     | hip            | 11    |
| calves            | 4     | LE             | 9     |
| humoral           | 3     | Ve             | 7     |
| cortisol          | 3     | strain         | 7     |
| ceftriaxone       | 3     | PF suture      | 7     |
| CCC               | 3     | GB             | 7     |
| anticancer        | 3     | sample         | 6     |
| venomous          | 2     | PRP            | 6     |

**Table 18.** Most frequent false positives and negatives on test data for AnatomyTagger

| False positive       |       | False negative |       |
|----------------------|-------|----------------|-------|
| String               | Count | String         | Count |
| SLAP-2               | 9     | Mo             | 12    |
| surface              | 7     | LE             | 9     |
| calves               | 7     | Ve             | 7     |
| food samples         | 4     | strain         | 7     |
| CCC                  | 4     | PF suture      | 7     |
| neural network       | 3     | GB             | 7     |
| junctional particles | 3     | sample         | 6     |
| capsular             | 3     | PRP            | 6     |
| anticancer           | 3     | LCs            | 6     |
| stromal cell         | 2     | HGF            | 6     |

## 10 ANATOMICAL ENTITY TAGGING STATISTICS

Table 19 provides statistics on the most frequently tagged entity mention strings by entity category.

| String                           | Count   | String                     | Count  | String                              | Count  |
|----------------------------------|---------|----------------------------|--------|-------------------------------------|--------|
| cells                            | 2419631 | sections                   | 137831 | brain                               | 488847 |
| cell                             | 1714007 | vascular                   | 133246 | liver                               | 347229 |
| cellular                         | 402136  | nodes                      | 99762  | heart                               | 272784 |
| neurons                          | 254017  | node                       | 89721  | skin                                | 229536 |
| strains                          | 228474  | site                       | 89275  | lung                                | 210204 |
| Cells                            | 214817  | neural                     | 88601  | muscle                              | 205761 |
| macrophages                      | 157422  | myocardial                 | 84177  | cardiac                             | 194101 |
| neuronal                         | 143993  | cortical                   | 68029  | renal                               | 144015 |
| T cells                          | 136330  | coronary                   | 67895  | eye                                 | 130512 |
| cell lines                       | 115806  | bone marrow                | 67678  | kidney                              | 123728 |
| (a) CELL                         |         | (b) MULTI-TISSUE STRUCTURE |        | (c) ORGAN                           |        |
| String                           | Count   | String                     | Count  | String                              | Count  |
| membrane                         | 360308  | tumor                      | 478772 | blood                               | 630776 |
| nuclear                          | 255099  | cancer                     | 397611 | serum                               | 512719 |
| surface                          | 252362  | tumors                     | 178195 | samples                             | 348687 |
| plasmid                          | 204185  | breast cancer              | 178053 | plasma                              | 281806 |
| mitochondrial                    | 193536  | tumour                     | 128825 | cytoplasmic                         | 109427 |
| chromosome                       | 183610  | samples                    | 105660 | extracts                            | 101130 |
| chromatin                        | 127510  | cancers                    | 78289  | cytoplasm                           | 92070  |
| nucleus                          | 123906  | tumours                    | 66634  | supernatant                         | 85236  |
| nuclei                           | 113057  | HCC                        | 53729  | urine                               | 78755  |
| mitochondria                     | 108343  | prostate cancer            | 53366  | milk                                | 73513  |
| (d) CELLULAR COMPONENT           |         | (e) CANCER                 |        | (f) ORGANISM SUBSTANCE              |        |
| String                           | Count   | String                     | Count  | String                              | Count  |
| tissue                           | 417212  | body                       | 433504 | lesions                             | 115555 |
| tissues                          | 246654  | oral                       | 187260 | lesion                              | 105471 |
| bone                             | 188998  | head                       | 155595 | wound                               | 84769  |
| cartilage                        | 43802   | arm                        | 98067  | glaucoma                            | 24354  |
| adipose tissue                   | 33811   | abdominal                  | 72059  | wounds                              | 21702  |
| capillary                        | 31422   | neck                       | 62324  | edema                               | 16558  |
| epithelial                       | 26652   | knee                       | 60921  | thrombus                            | 10975  |
| specimens                        | 26388   | hip                        | 59390  | cystic                              | 9778   |
| endothelium                      | 25346   | breast                     | 56212  | ulcer                               | 8041   |
| epithelium                       | 24349   | hand                       | 53044  | ulcerative                          | 6905   |
| (g) TISSUE                       |         | (h) ORGANISM SUBDIVISION   |        | (i) PATHOLOGICAL FORMATION          |        |
| String                           | Count   | String                     | Count  | String                              | Count  |
| intracellular                    | 229660  | cardiovascular             | 164327 | embryos                             | 180799 |
| extracellular                    | 117927  | respiratory                | 87350  | embryo                              | 70695  |
| intraperitoneal                  | 25068   | immune system              | 58628  | embryonic                           | 59739  |
| subcutaneous                     | 23864   | CNS                        | 36507  | eggs                                | 49952  |
| intracranial                     | 19912   | central nervous system     | 35195  | egg                                 | 29725  |
| percutaneous                     | 19401   | nervous system             | 22003  | fetus                               | 18063  |
| lumen                            | 18902   | musculoskeletal            | 13470  | fetal                               | 17957  |
| subcutaneously                   | 18036   | endocrine                  | 8509   | fetuses                             | 11759  |
| intravenously                    | 17818   | neurologic                 | 7272   | Embryos                             | 9210   |
| intraperitoneally                | 14507   | respiratory tract          | 7022   | notochord                           | 4044   |
| (j) IMMATERIAL ANATOMICAL ENTITY |         | (k) ANATOMICAL SYSTEM      |        | (l) DEVELOPING ANATOMICAL STRUCTURE |        |

**Table 19.** Strings most frequently tagged as anatomical entity mentions by type.

## REFERENCES

- Lee, K.-J. *et al.* (2004). Biomedical named entity recognition using two-phase model based on svms. *J. of Biomedical Informatics*, **37**(6), 436–447.
